# Supplementary material
Source: Springer Nature journal article supplement (https://www.springermedizin.de/resource/supplementary/12885_2011_2966_MOESM1_ESM.pdf/9462392)

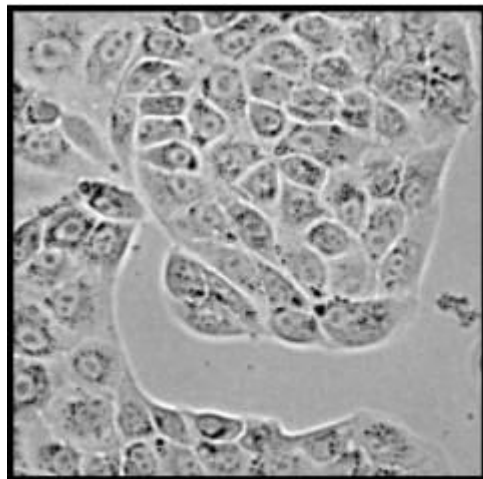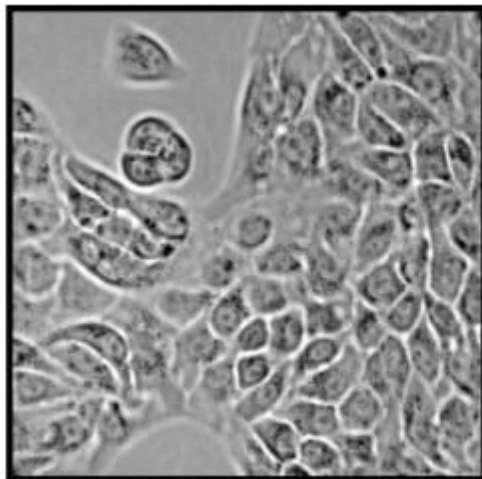

MDCK

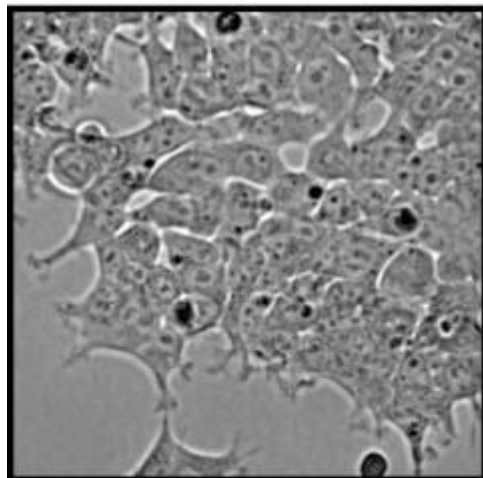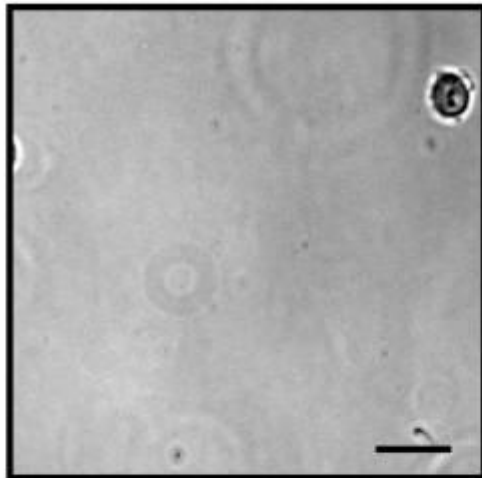

MDCK  
HA-Hakai

Before  
washing

After  
washing

Supplement: MOESM1 [file 9462392]
